# Supplementary material
Source: Royal Society of Chemistry journal article supplement (doi:10.1039/d6nr00984k)
Supplement: d6nr00984k1.pdf [file d6nr00984k1.pdf]

## Supporting Information

### Stabilizing Lithium Metal Anodes via Tuned $\text{Li}^+-\pi$ Interactions in Nanoporous Porous Aromatic Framework- Coated Separators

Beom Gwon Son,<sup>a</sup> Hye Ryung Byon,<sup>b</sup> Sangtae Kim,<sup>\*c</sup> and Eun Seon Cho<sup>\*a</sup>

<sup>a</sup> *Department of Chemical and Biomolecular Engineering, Korea Advanced Institute of Science and Technology (KAIST), Daejeon, 34141, Republic of Korea*

<sup>b</sup> *Department of Chemistry, Korea Advanced Institute of Science and Technology (KAIST), Daejeon 34141, Republic of Korea*

<sup>c</sup> *Department of Materials Science and Engineering, Hanyang University, Seoul 04763, Republic of Korea*

\*corresponding author: escho@kaist.ac.kr; sangtae@hanyang.ac.kr

## Characterization and Instrumentation

Fourier transform infrared spectroscopy (FT-IR) measurements were carried out over a range of 4000-400  $\text{cm}^{-1}$  (Bruker ALPHA-P). The content of C, H and N in PAF was determined by elemental analysis (EA, Thermo Scientific Flash 2000 analyzer, KAIST Analysis Center for Research Advancement (KARA)). The chemical functional groups of graphene layers were analyzed using X-ray photoelectron spectroscopy with monochromatic Al  $K\alpha$  as an excitation source (XPS, KALPA, Thermo VG Scientific, KARA), and spectra were calibrated to the C 1s peak at 284.6 eV. The specific surface areas and pore size distributions of PAF samples were obtained from  $\text{N}_2$  isotherms using the Brunauer-Emmet-Teller (BET) and Barrett-Joyner-Halenda (BJH) methods (Tristar II 3020, Micromeritics) after degassing at 120 °C.  $^1\text{H}$  and  $^7\text{Li}$  NMR spectra were acquired with a Bruker AVIII 400. Morphologies of PAF-coated separators were observed by field emission scanning electron microscopy (FE-SEM, SU5000, Hitachi, KARA). Raman spectra were acquired using a dispersive Raman spectrometer with a 532 nm excitation source (ARAMIS, Horiba Jobin Yvan, KARA).

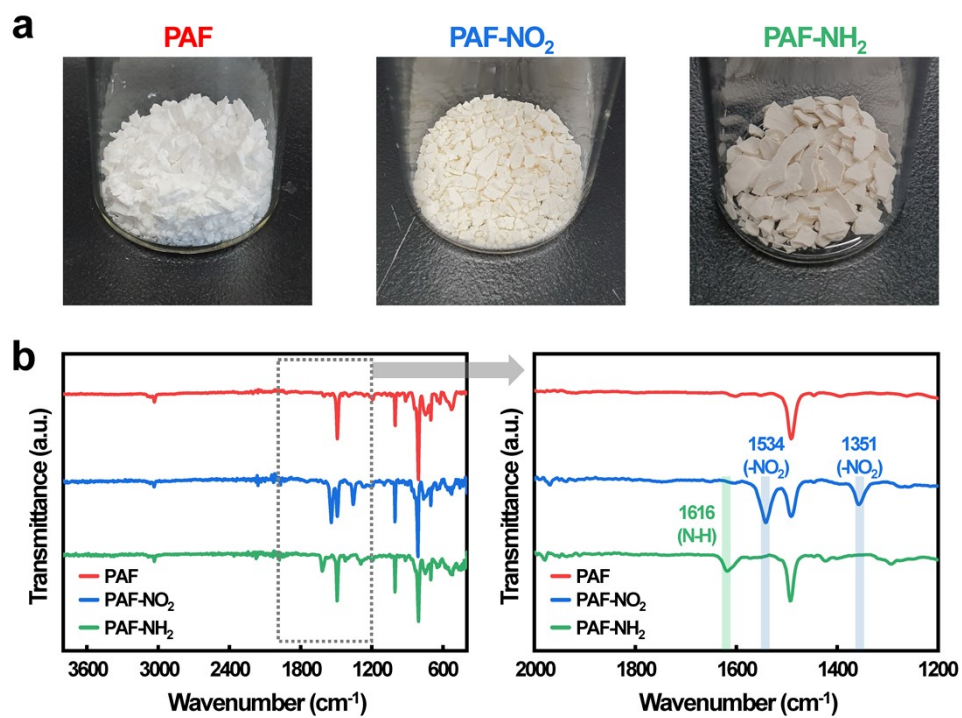

**Fig. S1** (a) Color change upon the introduction of nitro (PAF-NO<sub>2</sub>) and amino (PAF-NH<sub>2</sub>) groups into the PAF structure. (b) FT-IR spectra of pristine PAF and N-functionalized PAFs.

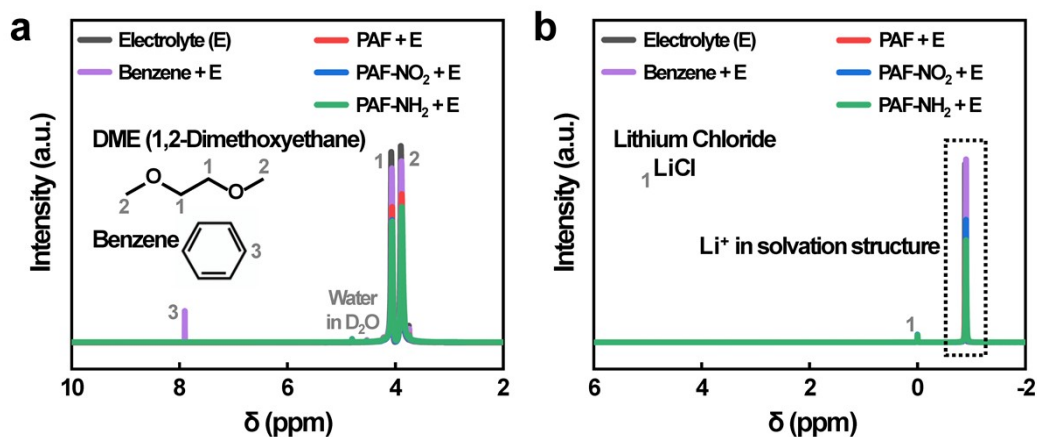

**Fig. S2** Characteristics of benzene- and PAFs-dispersed electrolyte solutions: (a)  $^1\text{H}$  and (b)  $^7\text{Li}$  NMR spectra (10 mg/mL in 1 M LiFSI/DME with 0.3 M  $\text{LiNO}_3$ ). For NMR measurements, the NMR tube was filled with the electrolyte in which benzene or PAFs were dispersed, while a capillary tube sealed with a polytetrafluoroethylene (PTFE) cap and filled with 1 M LiCl dissolved in  $\text{D}_2\text{O}$  was inserted into the NMR tube and used as an external reference. The chemical shifts were referenced to the water signal in  $\text{D}_2\text{O}$  at 4.8 ppm for  $^1\text{H}$  NMR and to the  $\text{Li}^+$  signal in LiCl at 0 ppm for  $^7\text{Li}$  NMR, using the external reference.

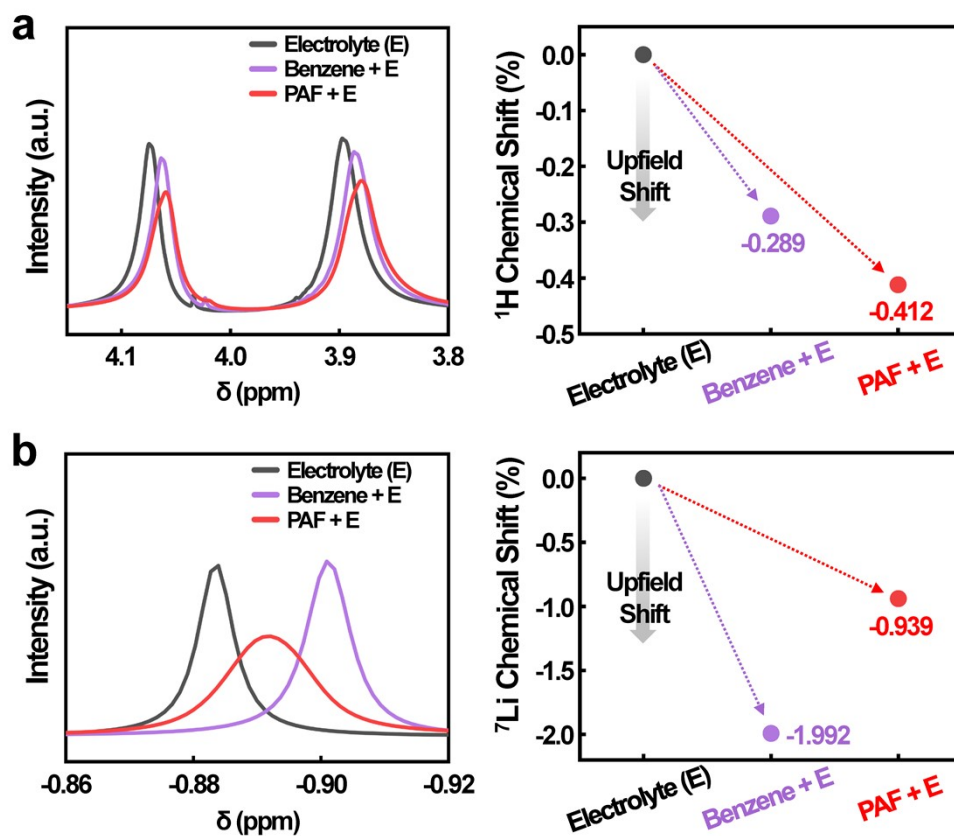

**Fig. S3** Characteristics of benzene- and PAF-dispersed electrolyte solutions: (a)  $^1\text{H}$  and (b)  $^7\text{Li}$  NMR spectra (prepared at a concentration of 10 mg/mL) with the relative changes in peak positions.

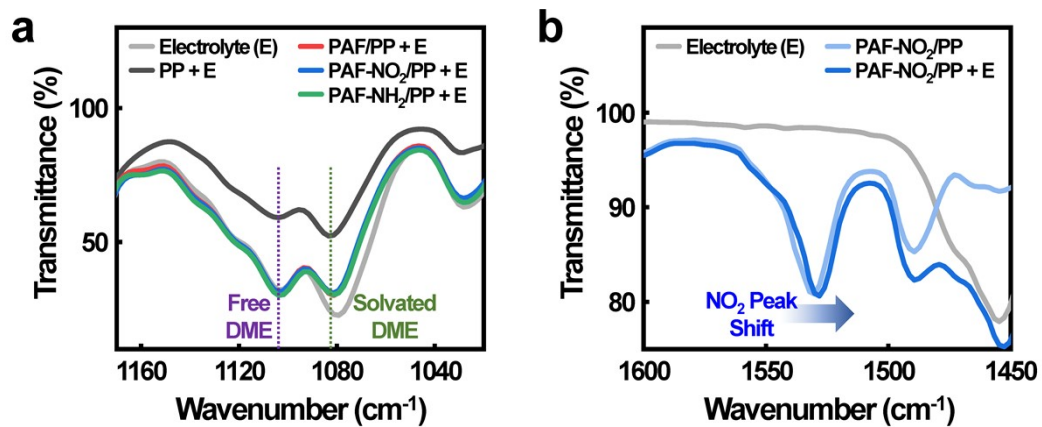

**Fig. S4** (a) FT-IR spectra of PAF- and N-functionalized PAF-coated PP separators after electrolyte impregnation. (b) FT-IR spectra of PAF-NO<sub>2</sub>/PP separator before and after electrolyte impregnation, showing the shift of the NO<sub>2</sub> peak.

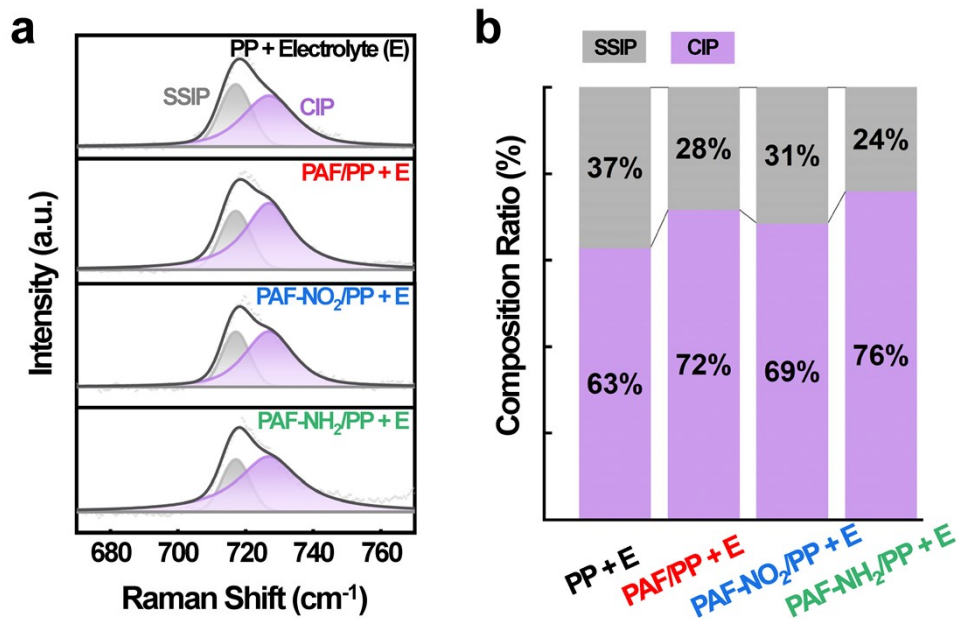

**Fig. S5** (a) Raman spectra of PAF- and N-functionalized PAF-coated PP separators after electrolyte impregnation, highlighting Li<sup>+</sup> solvation structures represented by solvent-separated ion pairs (SSIPs) to contact ion pairs (CIPs). (b) Ratio of SSIP to CIP in Li<sup>+</sup> solvation structures.

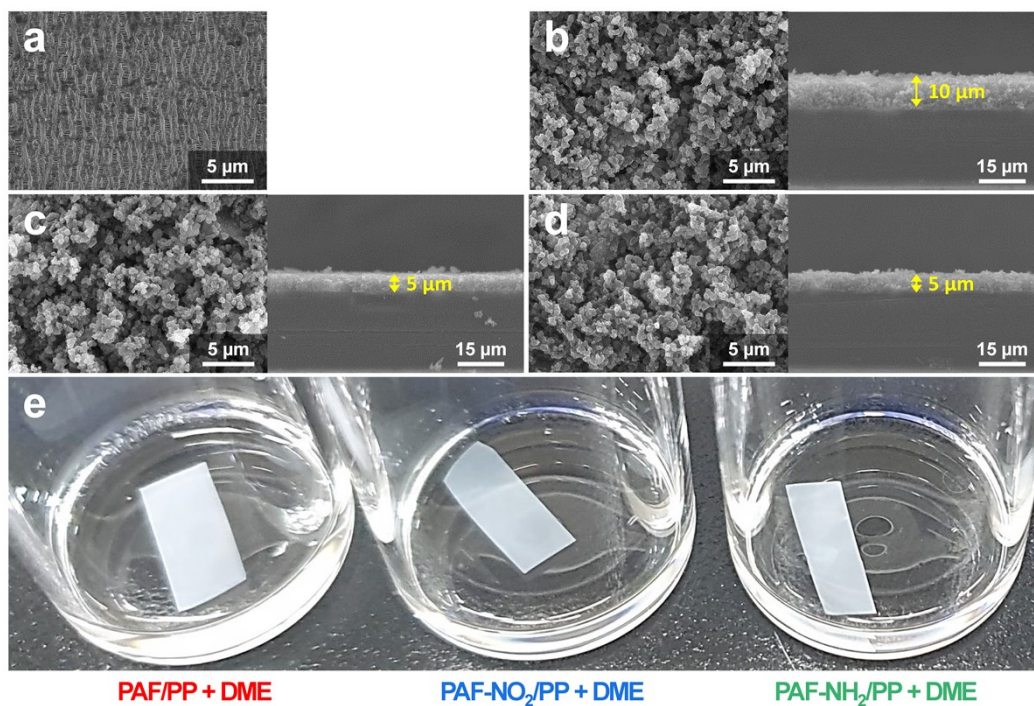

**Fig. S6** FE-SEM images of (a) bare PP (Celgard 2500), (b) PAF-, (c) PAF-NO<sub>2</sub>-, and (d) PAF-NH<sub>2</sub>-coated separators on the coated-surface and cross-sectional views (mass loading = 0.10 mg/cm<sup>2</sup>). (e) Photos of PAF-coated separators immersed in DME electrolyte solvent, demonstrating the enhanced stability afforded by the incorporation of a binder (CMC/SBR 1:1 wt %).

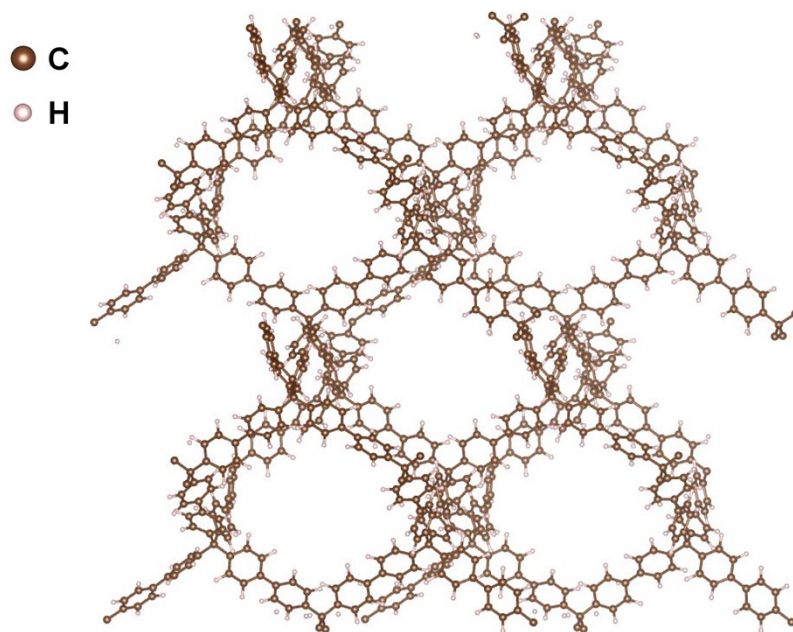

**Fig. S7** The modeled crystalline PAF structure with repeating unit cells.

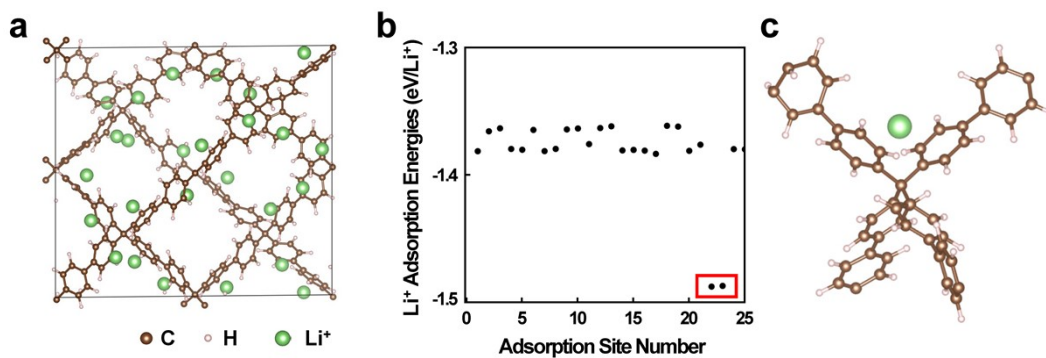

**Fig. S8** (a) Schematic illustration of the 25  $\text{Li}^+$  adsorption sites considered in the model. (b) The computed  $\text{Li}^+$  adsorption energies for each site and (c) the optimized atomic configurations of the two sites with strengthened  $\text{Li}^+$  adsorption (highlighted with red boxes in (b)), where  $\text{Li}^+$  is positioned between two phenyl rings.

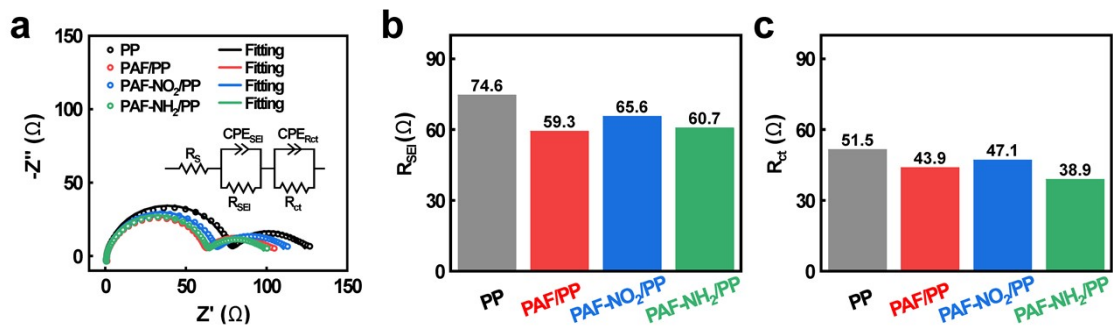

**Fig. S9** (a) EIS spectra of Li|Li symmetric cells with PAF- and N-functionalized PAF-coated separators (inset: equivalent circuit model used for fitting, where  $R_s$ ,  $R_{SEI}$ , and  $R_{ct}$  correspond to bulk electrolyte resistance, SEI resistance, and charge transfer resistance, respectively;  $CPE_{SEI}$  and  $CPE_{Rct}$  are constant phase elements that represent incomplete double-layer capacitance at the electrode surface). Comparison of (b)  $R_{SEI}$  and (c)  $R_{ct}$  values for PAF- and N-functionalized PAF-coated separators.

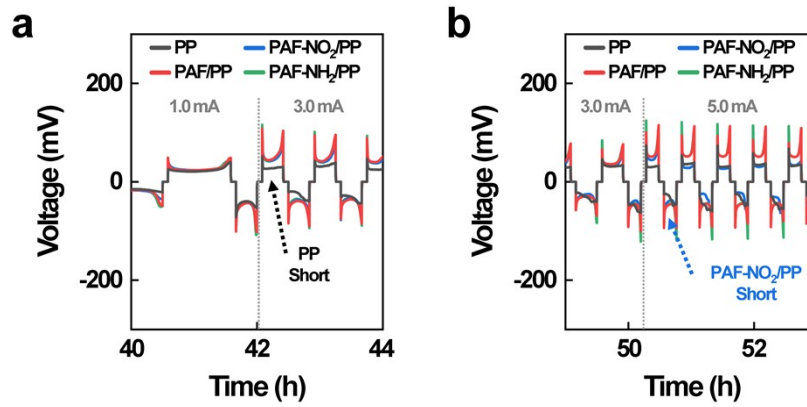

**Fig. S10** Rate performance of Li|Li symmetric cells at current densities from 0.5 to 5.0 mA/cm<sup>2</sup> with a capacity of 1.0 mAh/cm<sup>2</sup>, with a detailed representation of the short-circuiting points observed for cells using (a) the PP separator and (b) the PAF-NO<sub>2</sub>/PP separator.

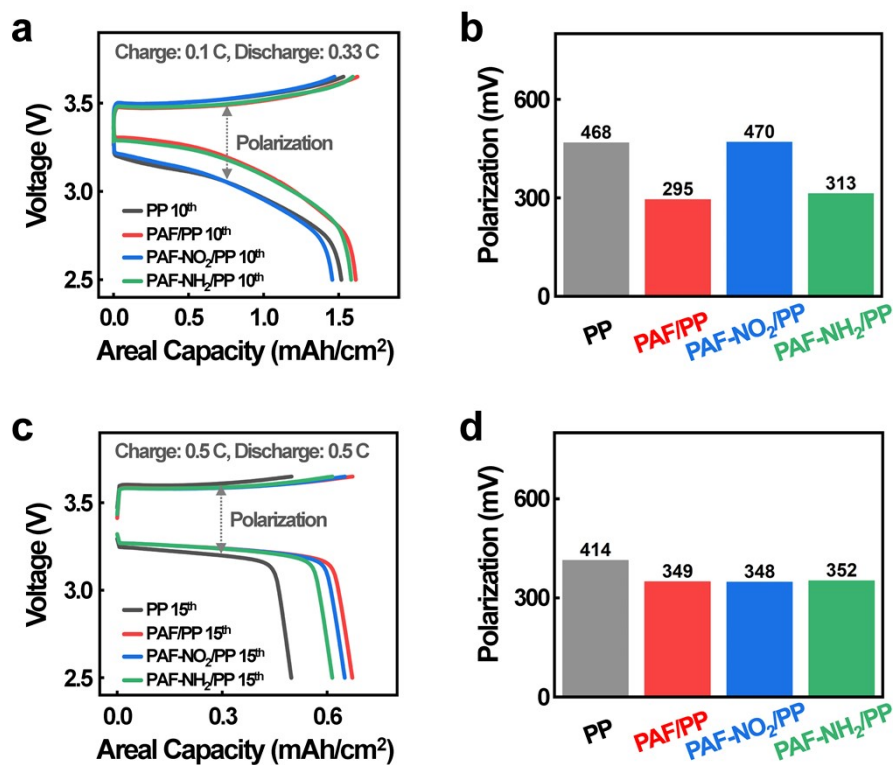

**Fig. S11** (a) Charge/discharge curves of Li|LFP full cells at the 10<sup>th</sup> cycle, measured at a charge rate of 0.1 C and a discharge rate of 0.33 C within a voltage window of 2.5-3.65 V (vs. Li/Li<sup>+</sup>), comparing PP and PAF-coated separators, along with (b) the corresponding polarization voltage at the mid areal capacity. (c) Charge/discharge curves of Li|LFP full cells at 0.5 C (within the rate performance range of 0.1-0.5 C) for PP and PAF-coated separators, and (d) the corresponding polarization voltage at the mid areal capacity.

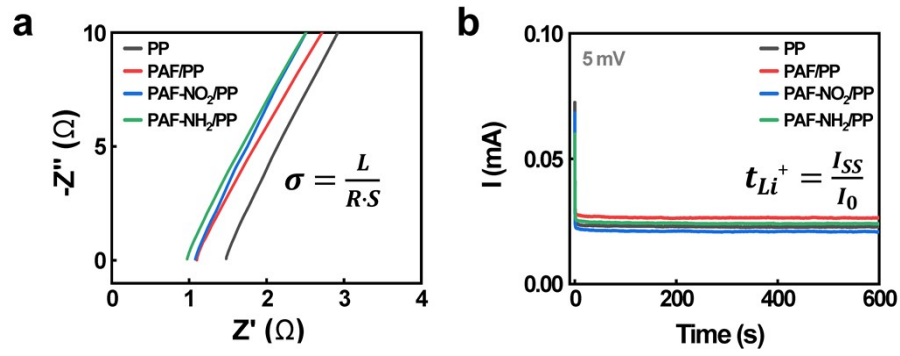

**Fig. S12** (a) Nyquist impedance spectra of stainless steel/separators/stainless steel cells based on PAF- and N-functionalized PAF-coated separators (the equation for calculating ionic conductivity ( $\sigma$ ) is presented, where  $L$  is the separator thickness,  $R$  is the bulk resistance, and  $S$  is the electrode area.). (b) Current-time curves of Li|separator|Li cells employing PAF- and N-functionalized PAF-coated separators (the equation for calculating the Li<sup>+</sup> transference number ( $t_{Li^+}$ ) is shown, where  $I_0$  and  $I_{SS}$  denote the initial and steady-state current values, respectively.).

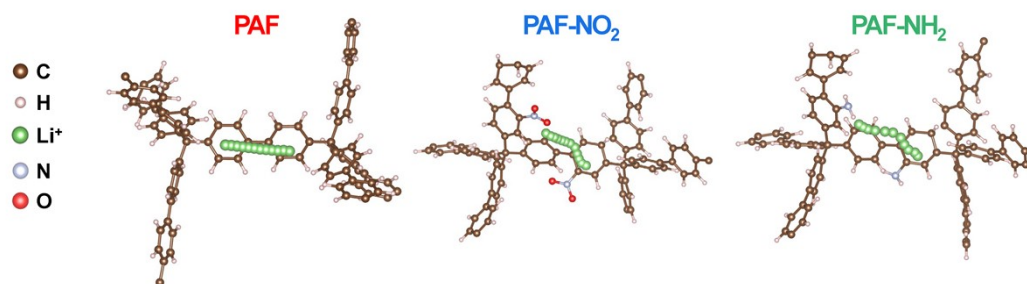

**Fig. S13** Calculated  $\text{Li}^+$  migration pathways between adjacent phenyl rings in pristine,  $\text{NO}_2$ -modified, and  $\text{NH}_2$ -modified PAFs.

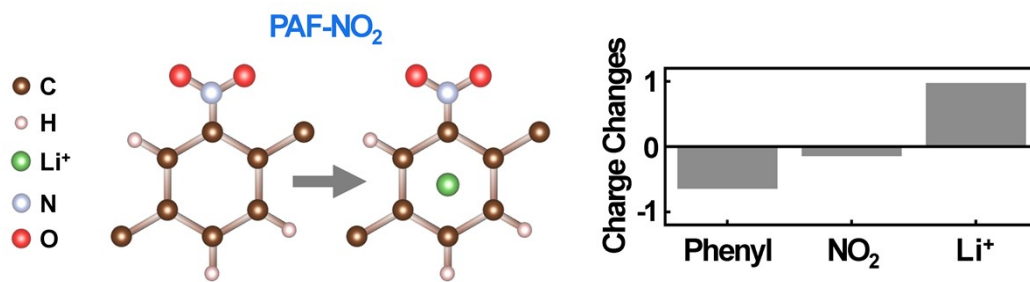

**Fig. S14** Charge redistribution of the framework components in PAF-NO<sub>2</sub> and the adsorbed Li<sup>+</sup> when Li<sup>+</sup> is adsorbed onto the phenyl ring of PAF-NO<sub>2</sub>.

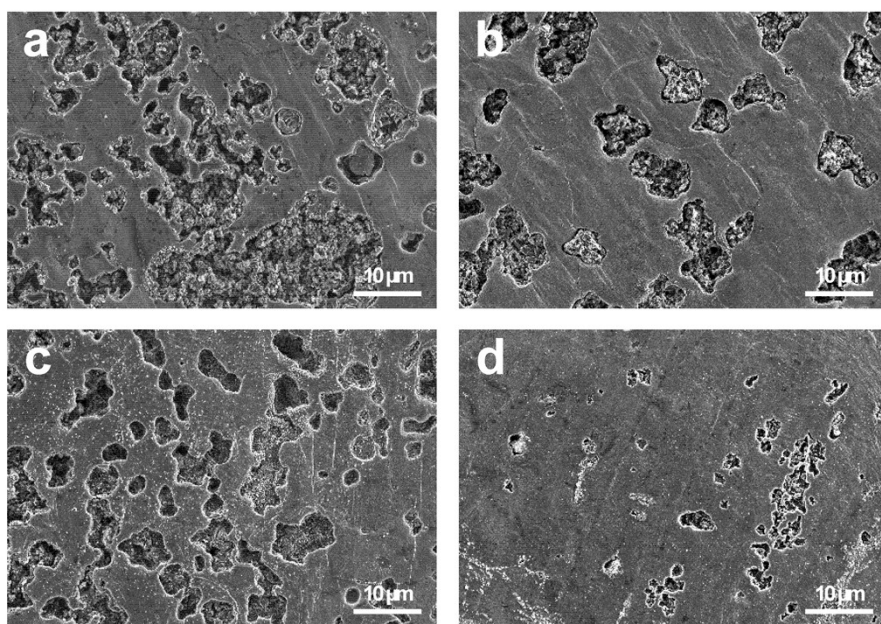

**Fig. S15** FE-SEM images of the Li metal surface after one charge-discharge cycle in Li|LFP full cells using (a) PP, (b) PAF/PP, (c) PAF-NO<sub>2</sub>/PP, and (d) PAF-NH<sub>2</sub>/PP separators.

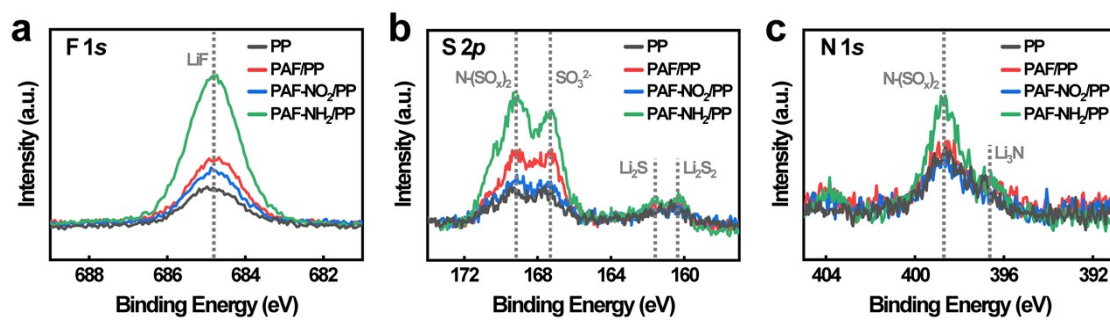

**Fig. S16** XPS characterization of the SEI layers formed on the Li metal surface after one charge–discharge cycle in Li|LFP full cells with various separators. The spectra in the (a) F 1s, (b) S 2p, and (c) N 1s regions were obtained after Ar<sup>+</sup> (2 keV) etching for 40 s.

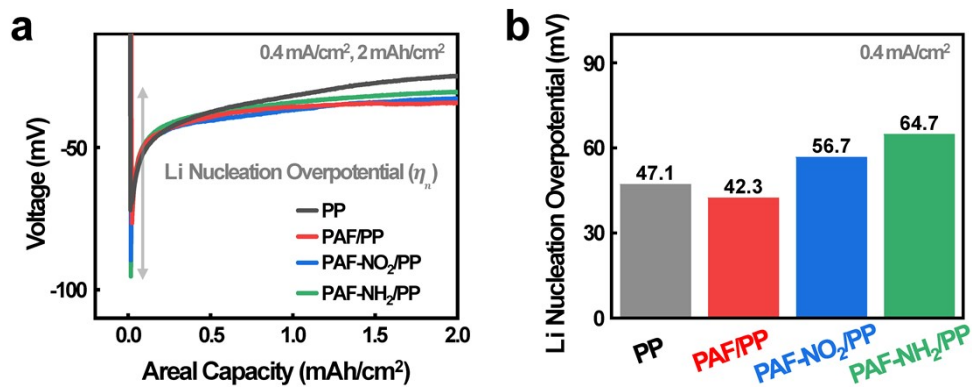

**Fig. S17** (a) Voltage profile at the initiation of Li deposition at 0.4 mA/cm<sup>2</sup> with a capacity of 2.0 mAh/cm<sup>2</sup> for Li|Cu cells with different separators, and (b) Li nucleation overpotential during Li deposition in Li|Cu cells.

**Table S1** Summary of XPS survey and elemental analysis results of PAF and N-functionalized PAFs, with the degree of N substitution expressed as the N/C atomic ratio (%).

|                     | N-substituted<br>degrees | XPS survey (at%) |     |     | N/C atomic<br>ratio (%) |
|---------------------|--------------------------|------------------|-----|-----|-------------------------|
|                     |                          | C                | O   | N   |                         |
| PAF                 | -                        | 98.1             | 1.9 | -   | -                       |
| PAF-NO <sub>2</sub> | 1.0                      | 89.9             | 6.5 | 3.6 | 4.0                     |
| PAF-NH <sub>2</sub> | 1.1                      | 93.1             | 2.7 | 4.2 | 4.5                     |

  

|                     | N-substituted<br>degrees | Elemental analysis (wt%) |     |     | N/C weight<br>ratio (%) |
|---------------------|--------------------------|--------------------------|-----|-----|-------------------------|
|                     |                          | C                        | H   | N   |                         |
| PAF                 | -                        | 94.9                     | 5.1 | -   | -                       |
| PAF-NO <sub>2</sub> | 0.9                      | 81.9                     | 4.7 | 3.4 | 4.2                     |
| PAF-NH <sub>2</sub> | 0.8                      | 87.5                     | 4.6 | 3.1 | 3.6                     |

**Table S2** Summary of the porosity of the pristine PP separator and PAF- and N-functionalized PAF-coated separators. The porosity was determined based on the weight difference before and after *n*-butanol impregnation.<sup>1,2</sup>

|                              | $W_d$ (mg) | $W_w$ (mg) | $V_d$ (cm <sup>3</sup> ) | Porosity (%) |
|------------------------------|------------|------------|--------------------------|--------------|
| <b>PP</b>                    | 2.9        | 5.8        | 0.0071                   | 51           |
| <b>PAF/PP</b>                | 3.4        | 9.6        | 0.0099                   | 77           |
| <b>PAF-NO<sub>2</sub>/PP</b> | 3.4        | 8.6        | 0.0085                   | 76           |
| <b>PAF-NH<sub>2</sub>/PP</b> | 3.4        | 8.9        | 0.0085                   | 80           |

The separator samples were first cut into circular pieces with a diameter of 1.9 cm and immersed in *n*-butanol for 2 h to ensure complete wetting. After immersion, excess *n*-butanol on the sample surface was gently removed using soft tissue, and the wet weight  $W_w$  was measured. The dry weight  $W_d$  and the volume  $V_d$  of the pristine separator were determined separately. The porosity was then determined using the equation below, where  $\rho_d$  represents the density of *n*-butanol. All values were averaged over three independent measurements.

$$\text{Porosity (\%)} = \frac{W_w - W_d}{\rho_d V_d}$$

**Table S3** Summary of ion transport properties of the pristine PP separator as well as PAF- and N-functionalized PAF-coated separators. The Li<sup>+</sup> conductivity was calculated as the product of the overall ionic conductivity and the Li<sup>+</sup> transference number.

|                              | Li <sup>+</sup> transference number | Ionic Conductivity (mS/cm) |       |                           |
|------------------------------|-------------------------------------|----------------------------|-------|---------------------------|
|                              |                                     | Overall                    | Anion | Cation (Li <sup>+</sup> ) |
| <b>PP</b>                    | 0.32                                | 0.084                      | 0.057 | 0.027                     |
| <b>PAF/PP</b>                | 0.45                                | 0.158                      | 0.087 | 0.071                     |
| <b>PAF-NO<sub>2</sub>/PP</b> | 0.31                                | 0.138                      | 0.096 | 0.042                     |
| <b>PAF-NH<sub>2</sub>/PP</b> | 0.40                                | 0.153                      | 0.092 | 0.061                     |

**Table S4** Summary of charge distributions upon  $\text{Li}^+$  adsorption on pristine and N-substituted PAFs, including the framework components and the adsorbed  $\text{Li}^+$ .

|                                                              | $\text{Li}^+$ | PAFs    |        |               |               |
|--------------------------------------------------------------|---------------|---------|--------|---------------|---------------|
|                                                              |               | Overall | Phenyl | $\text{NO}_2$ | $\text{NH}_2$ |
| <b>PAF</b>                                                   | -             | 0.03    | 0.03   | -             | -             |
| <b>PAF-<math>\text{Li}^+</math></b>                          | 0.98          | -0.55   | -0.55  | -             | -             |
| <b>PAF-<math>\text{NO}_2</math></b>                          | -             | 0.11    | 0.61   | -0.50         |               |
| <b>PAF-<math>\text{NO}_2</math>-<math>\text{Li}^+</math></b> | 0.74          | -0.35   | 0.47   | -0.82         |               |
| <b>PAF-<math>\text{NH}_2</math></b>                          | -             | 0.10    | 0.53   | -             | -0.43         |
| <b>PAF-<math>\text{NH}_2</math>-<math>\text{Li}^+</math></b> | 1.02          | -0.75   | -0.29  | -             | -0.46         |

**Table S5** XPS chemical compositions of the Li metal surface obtained after one charge-discharge cycle in Li|LFP full cells with various separators. Atomic percentages were determined after Ar<sup>+</sup> (2 keV) etching for 0, 40, 80, and 120 s.

| Separator                    | Etching time (s) | Chemical composition (Atomic %) |      |       |      |       |      | F/C         | (F+S+N)/C   |
|------------------------------|------------------|---------------------------------|------|-------|------|-------|------|-------------|-------------|
|                              |                  | C                               | F    | Li    | N    | O     | S    |             |             |
| <b>PP</b>                    | 0                | 29.41                           | 1.31 | 33.73 | 1.86 | 32.55 | 1.14 | <b>0.04</b> | <b>0.15</b> |
|                              | 40               | 14.12                           | 1.50 | 41.62 | 0.84 | 41.14 | 0.78 | <b>0.11</b> | <b>0.22</b> |
|                              | 80               | 12.23                           | 1.30 | 43.70 | 0.60 | 41.61 | 0.56 | <b>0.11</b> | <b>0.20</b> |
|                              | 120              | 10.65                           | 0.95 | 46.09 | 0.62 | 41.26 | 0.43 | <b>0.09</b> | <b>0.19</b> |
| <b>PAF/PP</b>                | 0                | 14.23                           | 1.02 | 49.58 | 0.95 | 33.28 | 0.94 | <b>0.07</b> | <b>0.20</b> |
|                              | 40               | 14.29                           | 2.01 | 42.61 | 0.88 | 38.86 | 1.36 | <b>0.14</b> | <b>0.30</b> |
|                              | 80               | 15.31                           | 2.01 | 40.40 | 0.67 | 40.72 | 0.89 | <b>0.13</b> | <b>0.23</b> |
|                              | 120              | 15.34                           | 1.58 | 40.43 | 0.57 | 41.48 | 0.59 | <b>0.10</b> | <b>0.18</b> |
| <b>PAF-NO<sub>2</sub>/PP</b> | 0                | 26.72                           | 1.1  | 37.39 | 1.27 | 32.4  | 1.12 | <b>0.04</b> | <b>0.13</b> |
|                              | 40               | 15.15                           | 1.54 | 39.13 | 0.64 | 42.8  | 0.73 | <b>0.10</b> | <b>0.19</b> |
|                              | 80               | 14.25                           | 1.21 | 40.38 | 0.47 | 43.16 | 0.53 | <b>0.08</b> | <b>0.16</b> |
|                              | 120              | 11.97                           | 0.84 | 44.7  | 0.43 | 41.64 | 0.42 | <b>0.07</b> | <b>0.14</b> |
| <b>PAF-NH<sub>2</sub>/PP</b> | 0                | 18.91                           | 2.67 | 41.28 | 1.77 | 32.9  | 2.47 | <b>0.14</b> | <b>0.37</b> |
|                              | 40               | 13.96                           | 4.49 | 38.62 | 1.26 | 39.3  | 2.37 | <b>0.32</b> | <b>0.58</b> |
|                              | 80               | 13.35                           | 3.69 | 39.77 | 0.94 | 40.65 | 1.6  | <b>0.28</b> | <b>0.47</b> |
|                              | 120              | 11.97                           | 2.85 | 43.02 | 0.79 | 39.89 | 1.49 | <b>0.24</b> | <b>0.43</b> |

## References

1. J. Zhu, M. Yanilmaz, K. Fu, C. Chen, Y. Lu, Y. Ge, D. Kim and X. Zhang, *J. Membr. Sci.*, 2016, **504**, 89-96.
2. C. Likitaporn, M. Okhawilai, P. Kasemsiri, J. Qin, P. Potiyaraj and H. Uyama, *Sci. Rep.*, 2022, **12**, 19915.
